# Supplementary material for: Histone deacetylase inhibitor MPT0B291 suppresses Glioma Growth in vitro and in vivo partially through acetylation of p53
Source: PubMed Central journal article supplement (PMC7645997; doi:10.7150/ijbs.45505), 2020-10-19

Figure S1

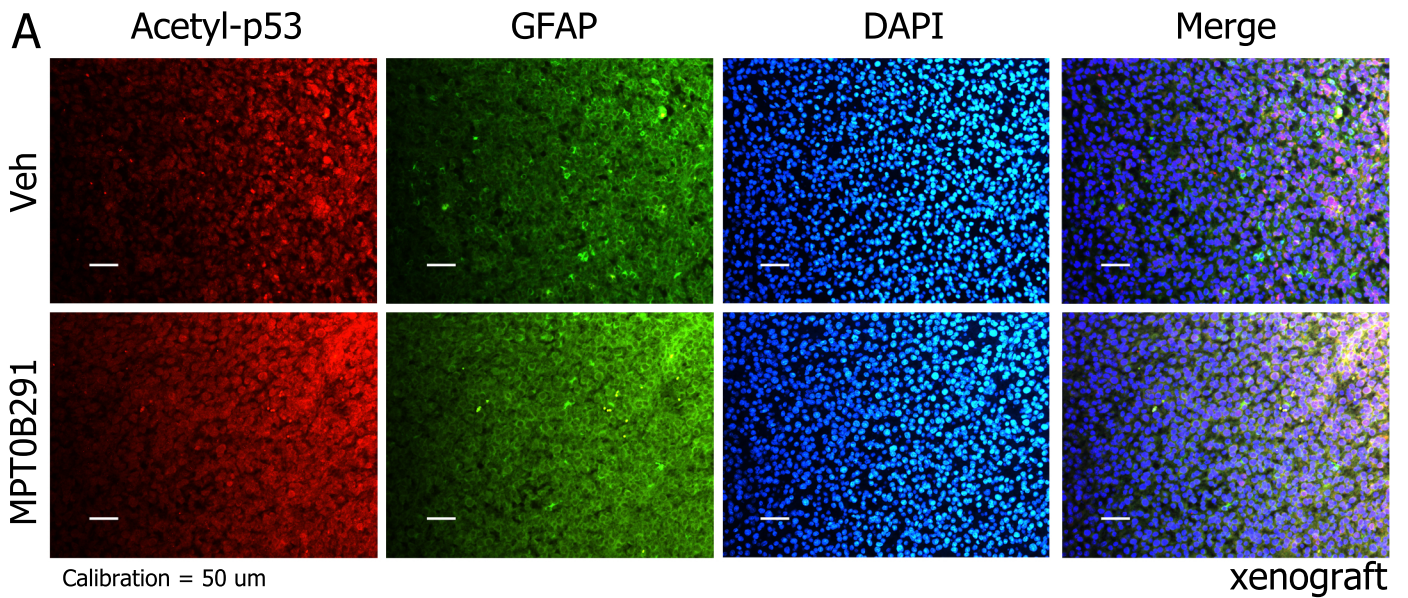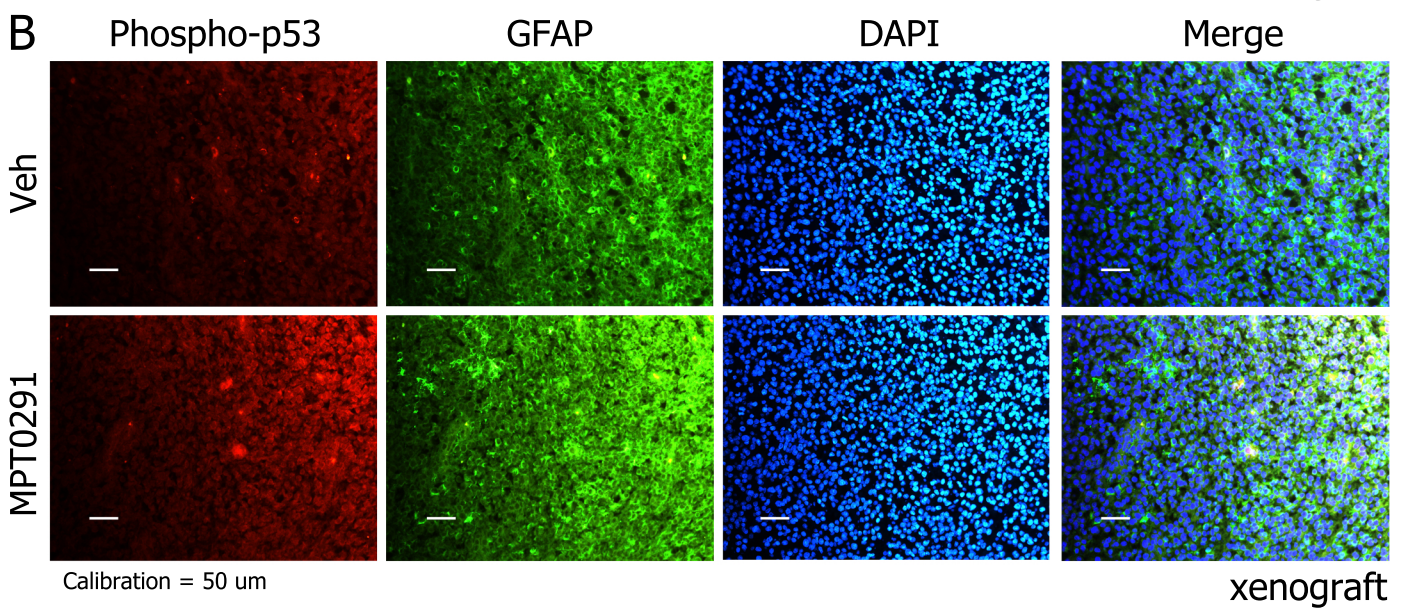

Figure S2

A

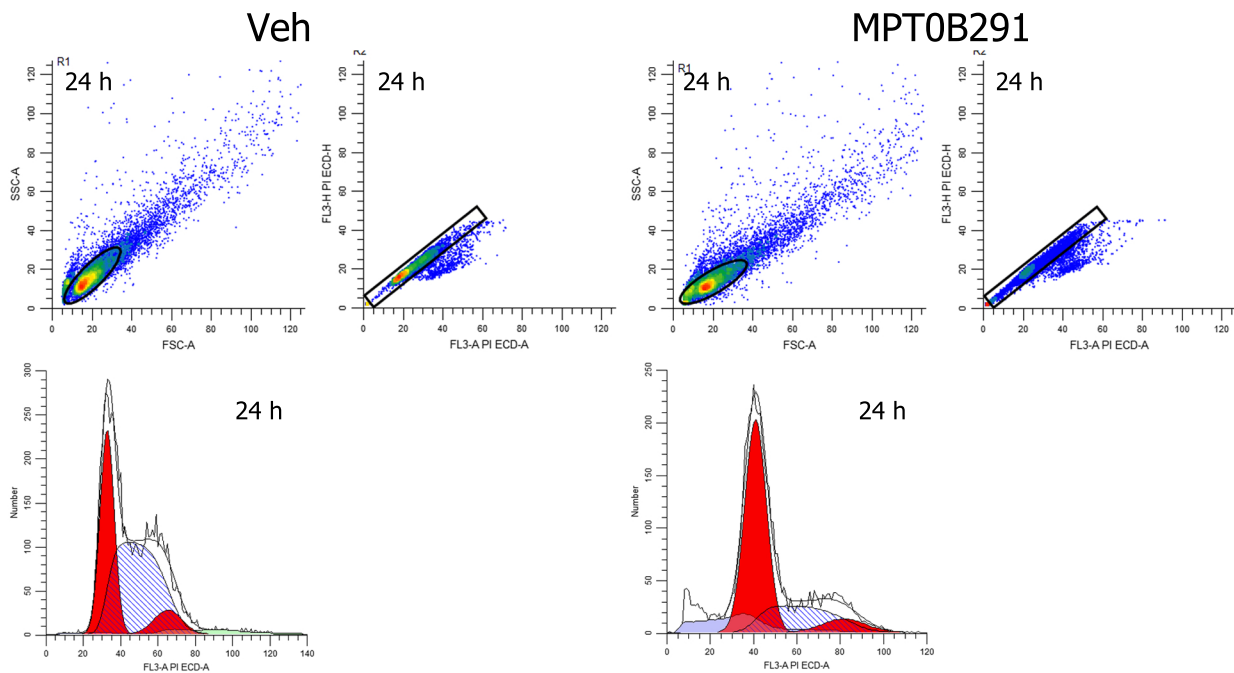

B

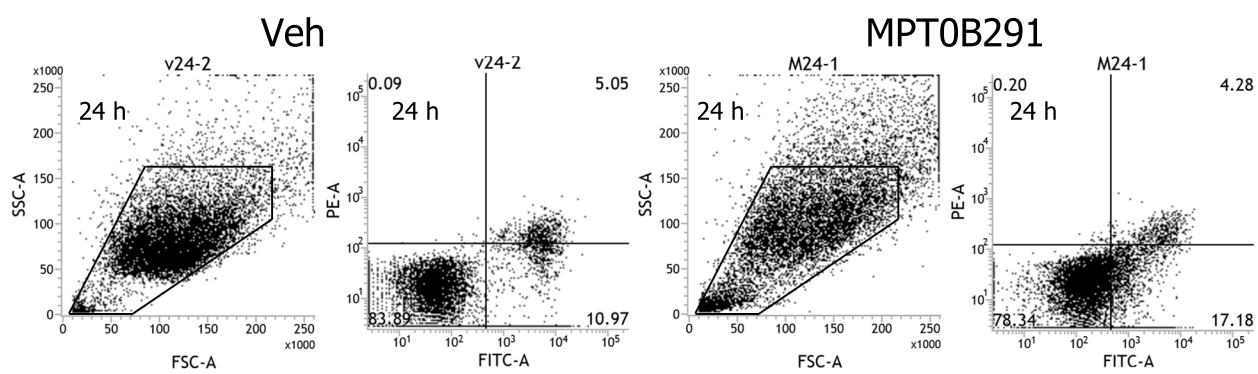

Supplement: ijbsv16p3184s1.pdf [file ijbsv16p3184s1.pdf]
